# Supplementary material for: Heat Shock Protein 90 Family Isoforms as Prognostic Biomarkers and Their Correlations with Immune Infiltration in Breast Cancer
Source: Biomed Res Int. 2020 Oct 21;2020:2148253. doi: 10.1155/2020/2148253 (PMC7596464; doi:10.1155/2020/2148253)
Supplement: Supplementary Materials — The prognostic significance of the HSP90AA1, HSP90AB1, HSP90B1, and TRAP1 expression in BRAC patients with different clinical parameters is shown in Supplementary Tables 1, 2, 3, and 4, respectively. [file 2148253.f1.zip]

Archive with 4 entries (4 files):
- 2148253.f1.docx
- 2148253.f2.docx
- 2148253.f3.docx
- 2148253.f4.docx
